# Supplementary material for: Detection of Hepatitis E Virus Genotype 3 in Feces of Capybaras (Hydrochoeris hydrochaeris) in Brazil
Source: MDPI journal article supplement (doi:10.3390/v15020335), 2023-01-24
Supplement: s1 [file s1]

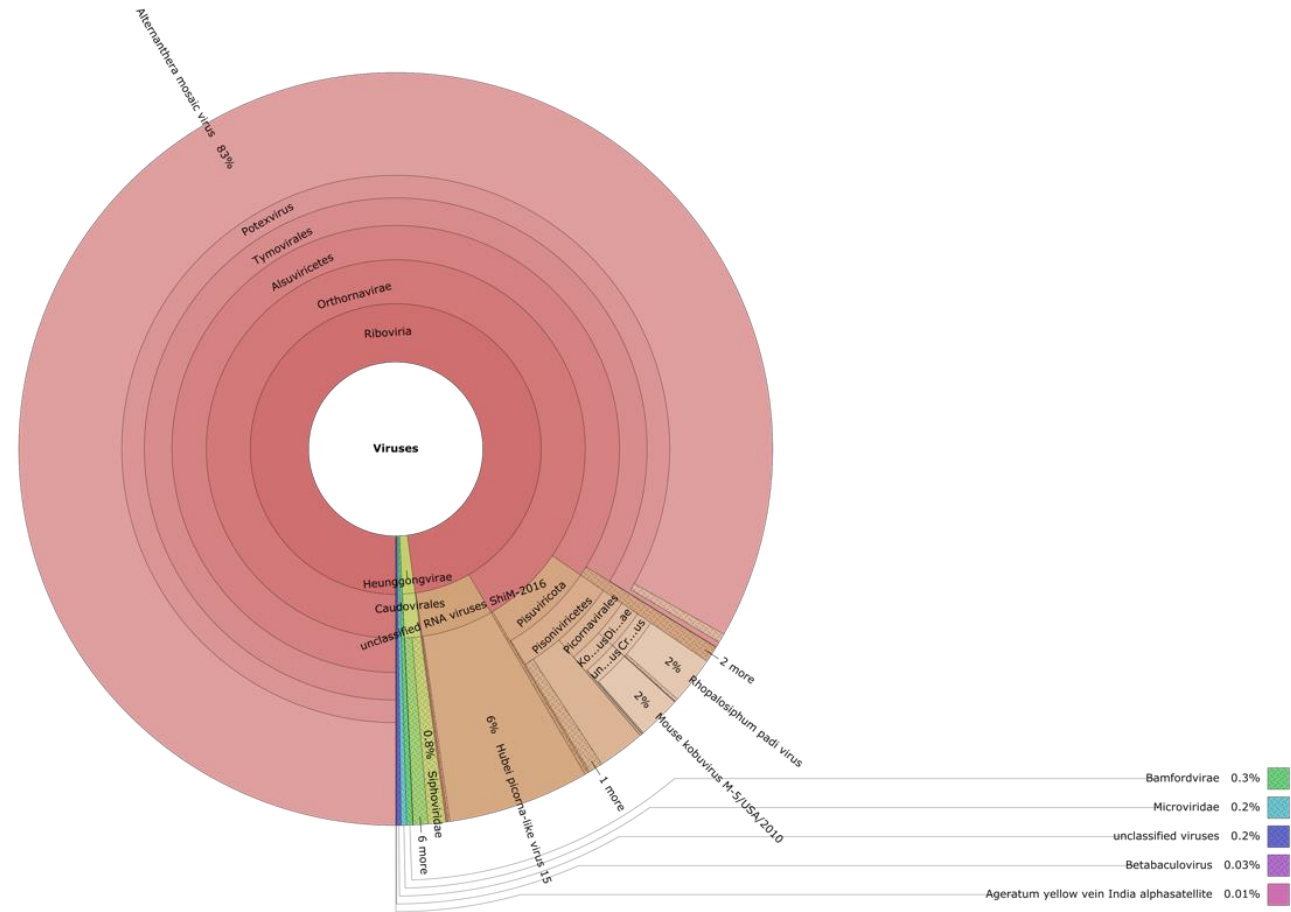

**Figure S2.** Plethora of viruses present in IAL-HEV\_921 sample according to Kraken2 classification (<https://genomebiology.biomedcentral.com/articles/10.1186/s13059-019-1891-0>).
