# Supplementary material for: Detection of Hepatitis E Virus Genotype 3 in Feces of Capybaras (Hydrochoeris hydrochaeris) in Brazil
Source: MDPI journal article supplement (doi:10.3390/v15020335), 2023-01-24
Supplement: s1 [file s1]

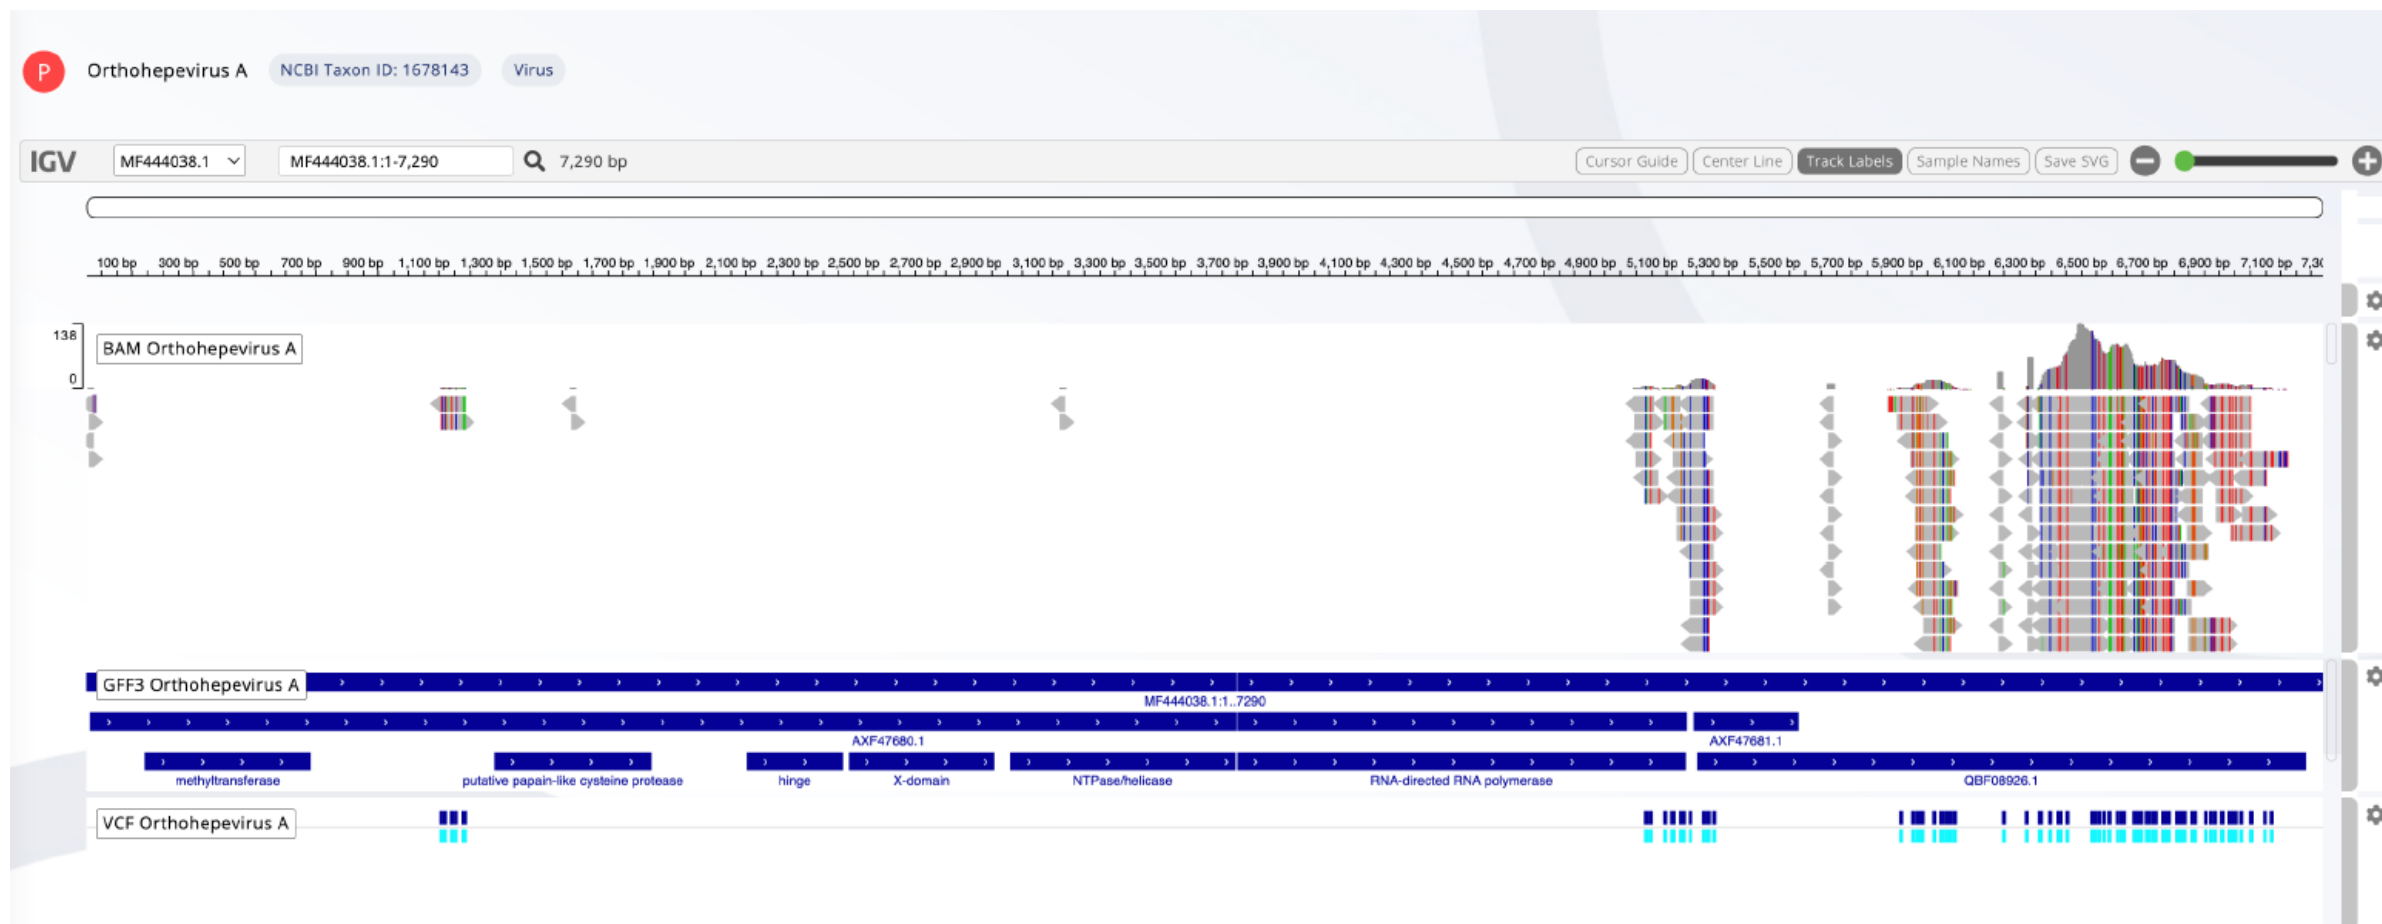

**Figure S3B.** Mapping coverage plot in the HEV reference genome according to the Varsmetagen online platform (<https://varsomics.com/varsmetagen/>).
