# Supplementary material for: Detection of Hepatitis E Virus Genotype 3 in Feces of Capybaras (Hydrochoeris hydrochaeris) in Brazil
Source: MDPI journal article supplement (doi:10.3390/v15020335), 2023-01-24
Supplement: s1 [file s1]

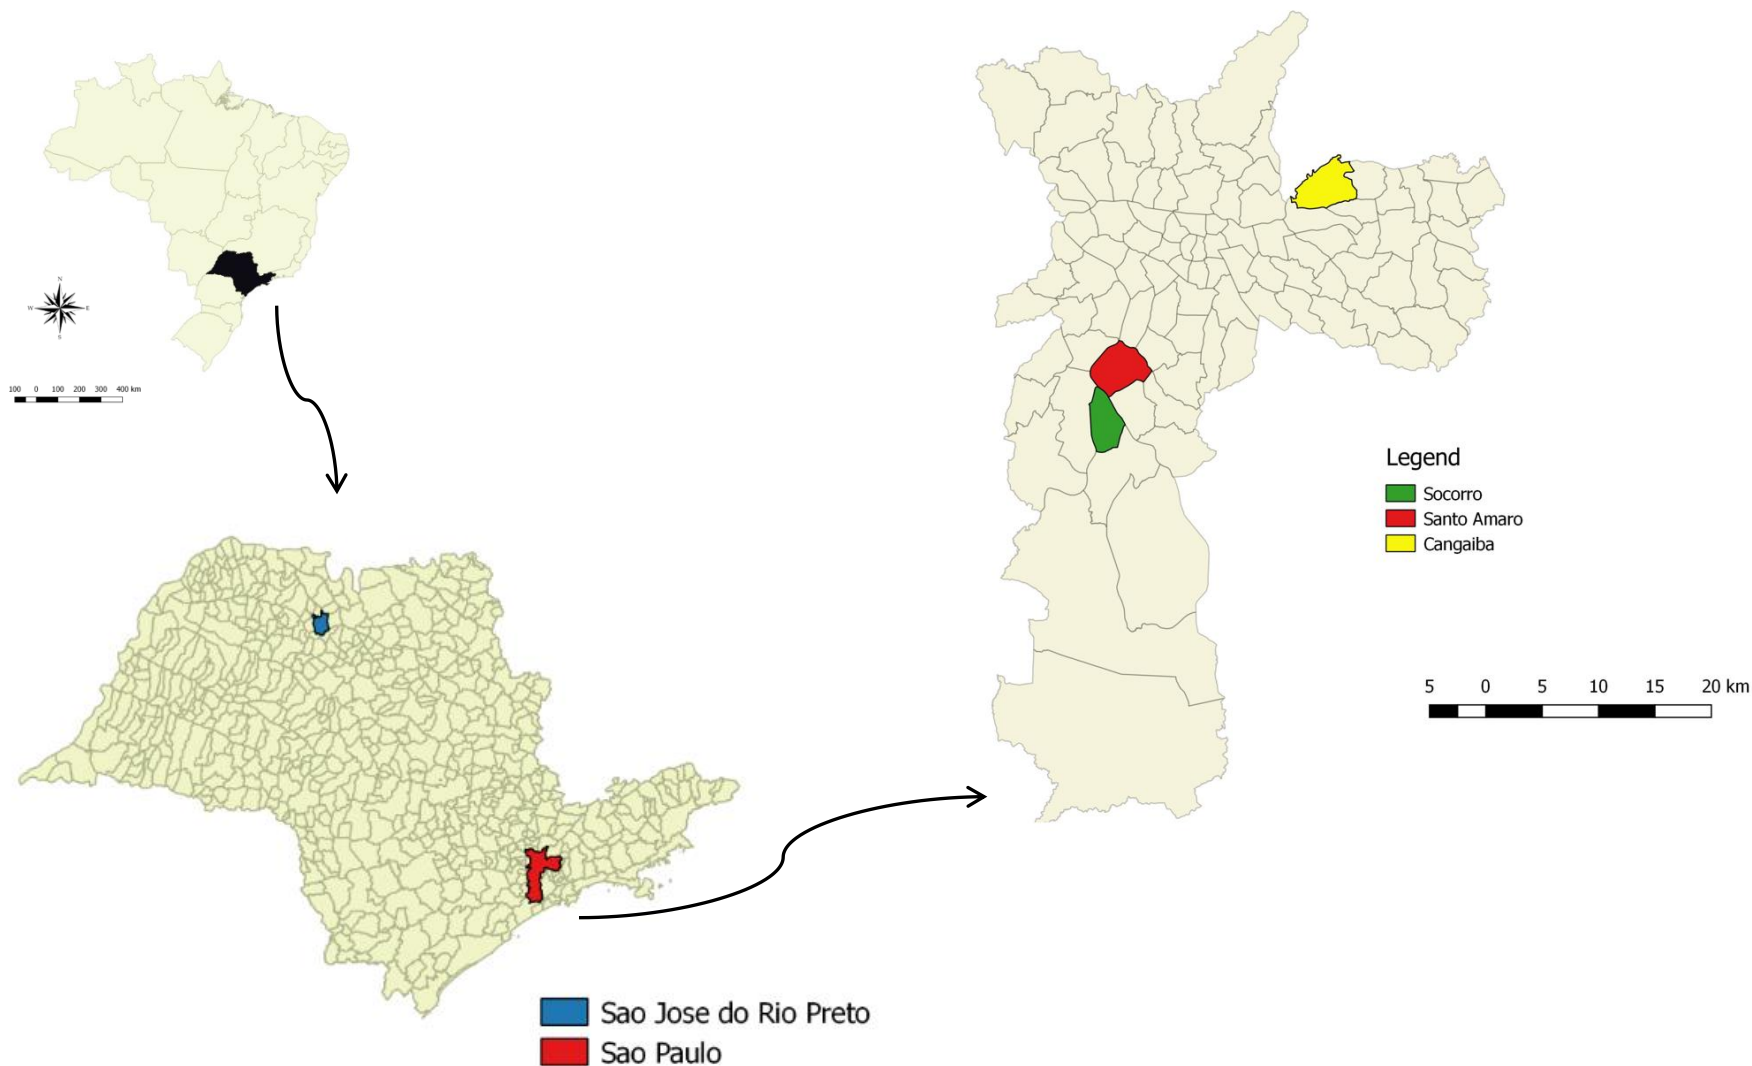

**Figure S1.** Map of São Paulo state, Southwestern region, Brazil; highlighting municipalities (in red and blue) and São Paulo municipalities' districts (in red, green and yellow) from which samples were collected from free-living capybaras in urban parks between 2018 and 2020. Up Left: Map of Brazil stressing São Paulo state. Down: Municipalities surveyed: São Paulo and São José do Rio Preto. Up Right: Districts surveyed at São Paulo municipality. Map was generated with QGIS software v2.14.9 ([https://www.qgis.org/pt\\_BR/site/about/index.html](https://www.qgis.org/pt_BR/site/about/index.html)).
