# Supplementary material for: Detection of Hepatitis E Virus Genotype 3 in Feces of Capybaras (Hydrochoeris hydrochaeris) in Brazil
Source: Viruses. 2023 Jan 24;15(2):335. doi: 10.3390/v15020335 (PMC9959927; doi:10.3390/v15020335)
Supplement: Supplementary file 1 [file viruses-15-00335-s001.zip]

Archive with 4 entries (4 files):
- Figure S3B.pdf
- Figure S1.pdf
- Figure S2.pdf
- Figure S3A.pdf
